# Supplementary material
Source: Springer Nature journal article supplement (https://www.springermedizin.de/resource/supplementary/12933_2013_722_MOESM4_ESM.pdf/9538814)

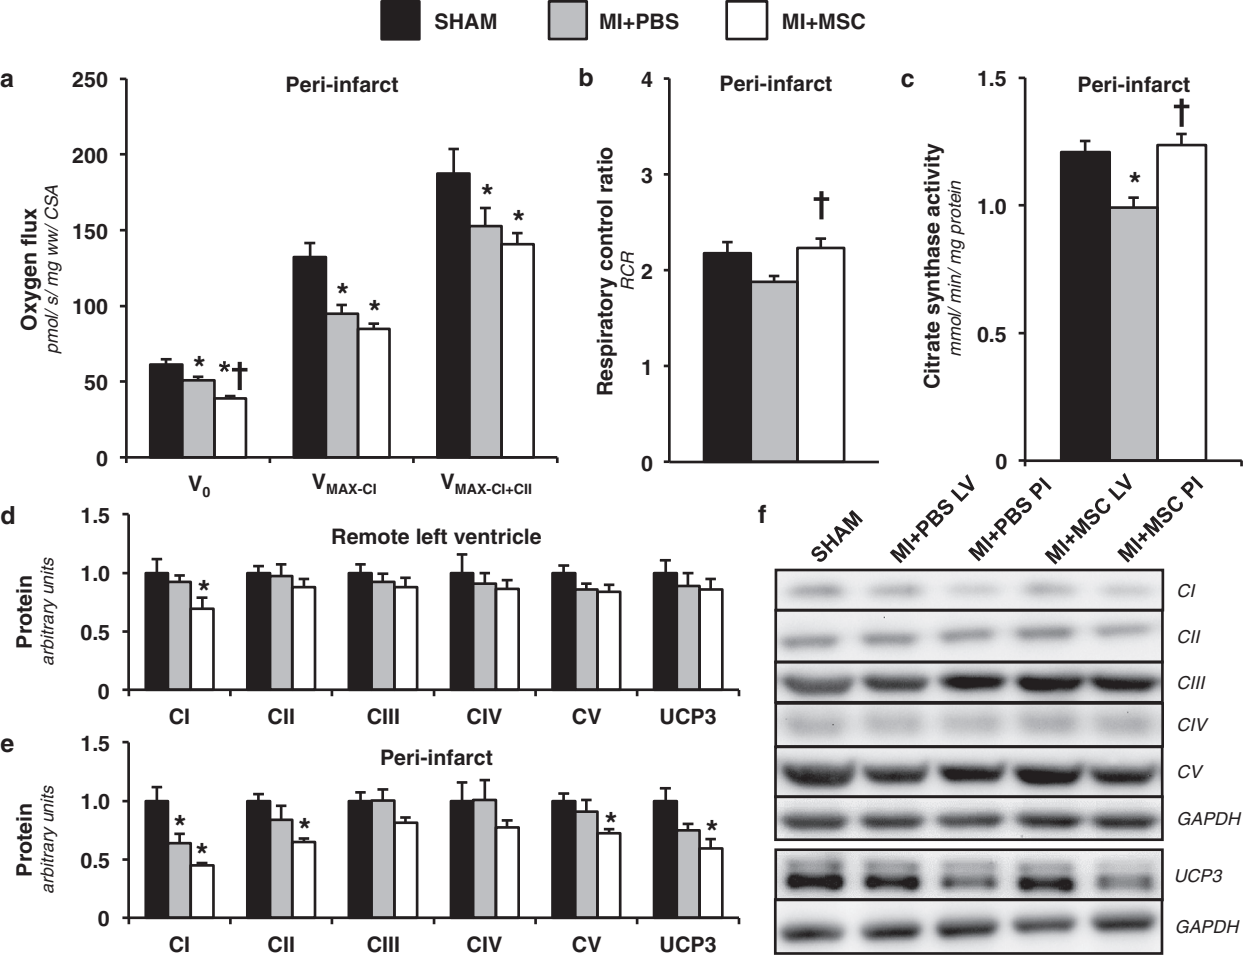

Supplement: MOESM4 [file 9538814]
